# Supplementary material for: A surfactant-free strategy for controllable growth of hierarchical copper oxide nanostructures
Source: Royal Society of Chemistry journal article supplement (doi:10.1039/c3ce40522b), 2013-01-01
Supplement: c3ce40522b.pdf [file c3ce40522b.pdf]

## Electronic Supplementary Information

# A surfactant-free strategy for controllable growth of hierarchical copper oxide nanostructures

Shaodong Sun, Yuexia Sun, Xiaozhe Zhang, Hongjia Zhang, Xiaoping Song and Zhimao Yang\*

\*E-mail: zmyang@mail.xjtu.edu.cn

**Table S1.** Sample denotations and their corresponding detailed experimental conditions and final shapes.

| sample | species of copper salts              | concentration of copper salts | concentration of NaOH | reaction temperature | reaction time | shape characteristics |
|--------|--------------------------------------|-------------------------------|-----------------------|----------------------|---------------|-----------------------|
| A      | CuSO <sub>4</sub>                    | 0.004 M                       | 0.02 M                | 80 °C                | 20 min        | flower-like           |
| B      | CuSO <sub>4</sub>                    | 0.04 M                        | 0.2 M                 | 80 °C                | 20 min        | flower-like           |
| C      | CuCl <sub>2</sub>                    | 0.004 M                       | 0.02 M                | 80 °C                | 20 min        | nanoplate-assemblies  |
| D      | CuCl <sub>2</sub>                    | 0.04 M                        | 0.2 M                 | 80 °C                | 20 min        | nanoplates            |
| E      | Cu(NO <sub>3</sub> ) <sub>2</sub>    | 0.004 M                       | 0.02 M                | 80 °C                | 5 min         | nanospindles          |
| F      | Cu(NO <sub>3</sub> ) <sub>2</sub>    | 0.04 M                        | 0.2 M                 | 80 °C                | 5 min         | nanoplates            |
| G      | Cu(CH <sub>3</sub> COO) <sub>2</sub> | 0.004 M                       | 0.02 M                | 80 °C                | 20 min        | nanoplate-assemblies  |
| H      | Cu(CH <sub>3</sub> COO) <sub>2</sub> | 0.04 M                        | 0.2 M                 | 80 °C                | 20 min        | nanoplates            |
